# Supplementary material
Source: HighWire-hosted journal article supplement (https://spcare.bmj.com/content/13/e3/e612)
Supplement: inline-supplementary-material-2 [file inline-supplementary-material-2.pdf]

## Supplemental Material 2

### Data Extraction Tool

| Details of publication                                                                                                                                                                |  |
|---------------------------------------------------------------------------------------------------------------------------------------------------------------------------------------|--|
| • First author                                                                                                                                                                        |  |
| • Reference                                                                                                                                                                           |  |
| Introduction                                                                                                                                                                          |  |
| • Aims                                                                                                                                                                                |  |
| Study participants                                                                                                                                                                    |  |
| • Country of study                                                                                                                                                                    |  |
| • Recruitment                                                                                                                                                                         |  |
| • Characteristics of participants: <ul style="list-style-type: none"> <li>- Number</li> <li>- Setting (home, hospital etc)</li> <li>- Age / sex / social class / ethnicity</li> </ul> |  |
| Methods                                                                                                                                                                               |  |
| • Date of fieldwork                                                                                                                                                                   |  |
| • Research methods                                                                                                                                                                    |  |
| • Analysis                                                                                                                                                                            |  |
| Key findings relevant to review                                                                                                                                                       |  |
| 1) What is <b>current practice</b> ?<br><i>Who prescribes, for whom, proximity to death?</i><br><i>Who administers?</i><br><i>Absence of AP?</i>                                      |  |
| 2) What are the <b>attitudes of patients</b> to AP?<br><i>Patients' acceptance / views</i>                                                                                            |  |
| 3) What are the <b>attitudes of family caregivers</b> to AP?<br><i>Carers' acceptance / views</i>                                                                                     |  |
| 4) What are the <b>attitudes of community healthcare professionals</b> to AP?<br><i>HCPs' acceptance of AP, concerns, views re use, barriers, facilitators, etc.</i>                  |  |

## Supplemental Material 2

### Data Extraction Tool

|                                                                                                                                                                                                                                     |  |
|-------------------------------------------------------------------------------------------------------------------------------------------------------------------------------------------------------------------------------------|--|
| 5) Evidence for <b>clinical effectiveness</b> ?<br><br><i><b>Clinical:</b> comfort / symptom control (who reported)</i>                                                                                                             |  |
| 6) Evidence for <b>cost / cost-effectiveness</b> ?<br><br><i><b>Service use:</b> admission avoidance, place of death, healthcare activity, etc.</i><br><br><i><b>Cost:</b> costs of drugs, admissions, healthcare activity, ect</i> |  |
| <b>Author(s) conclusion(s)</b>                                                                                                                                                                                                      |  |
| <b>Reviewer assessment of the internal validity, appropriateness and contribution of the study in answering the relevant research questions (Gough's WoE)</b>                                                                       |  |
| <b>Weight of Evidence A</b><br><br>Coherence and integrity of the evidence <i>in its own terms</i>                                                                                                                                  |  |
| <b>Weight of Evidence B</b><br><br>Appropriateness of <i>form of evidence</i> for answering review question                                                                                                                         |  |
| <b>Weight of Evidence C</b><br><br><i>Relevance of the evidence</i> for answering review question                                                                                                                                   |  |
| <b>Weight of Evidence D</b><br><br><i>Overall assessment</i> of study contribution to answering review question                                                                                                                     |  |
